# Supplementary figures and images for: Controlling bead and cell mobility in a recirculating hanging-drop network
Source: Royal Society of Chemistry journal article supplement (doi:10.1039/d3lc00103b), 2023-01-01

### No-slip boundary condition

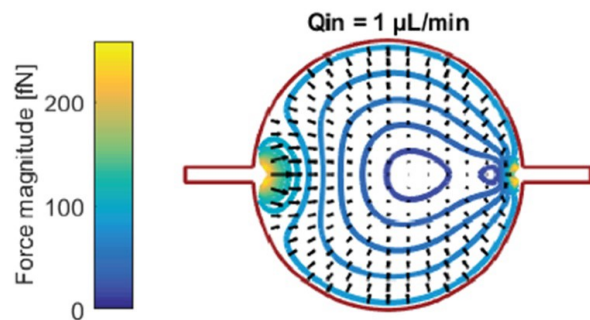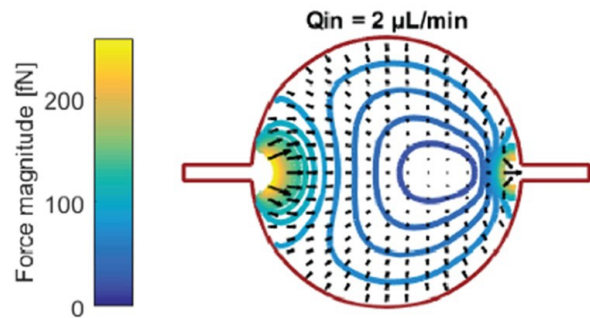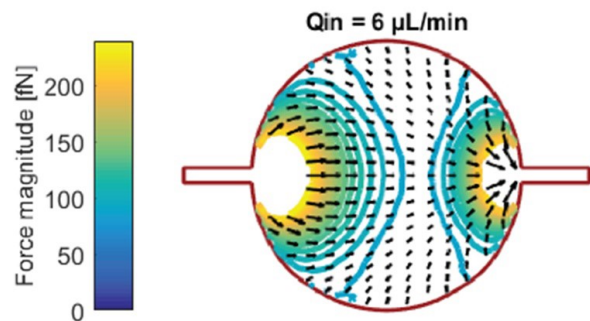

### Slip boundary condition

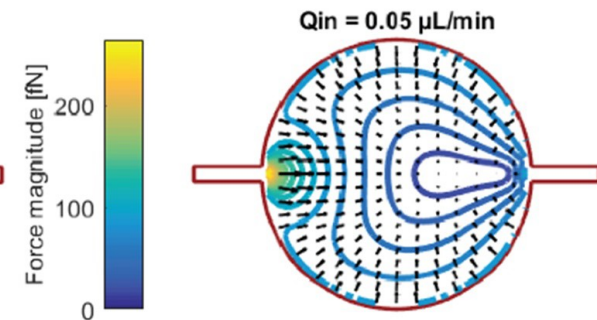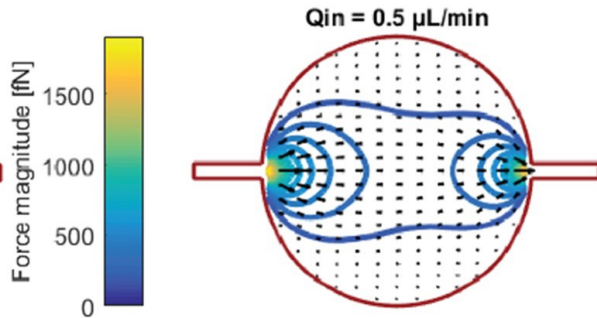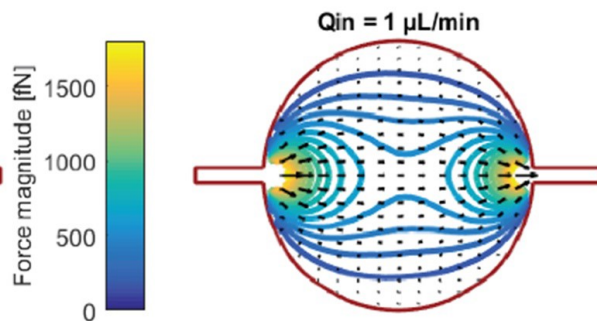

Supplement: d3lc00103b3.pdf [file d3lc00103b3.pdf]
